# Supplementary material for: Tracing the Plastic Tide: Assessing Microplastic Abundance and Distribution along the Attanagalu River in Sri Lanka
Source: Research Square preprint supplement (doi:10.21203/rs.3.rs-8237732/v1), 2025-12-12
Supplement: Supplementary file 1 [file 6fceb0a927d9badda77334e2.pdf]

## Sources

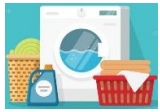

Household

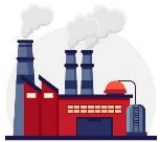

Industries

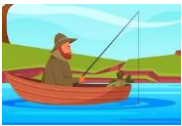

Fishing

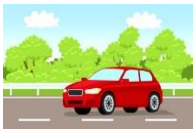

Transportation

## Impacts

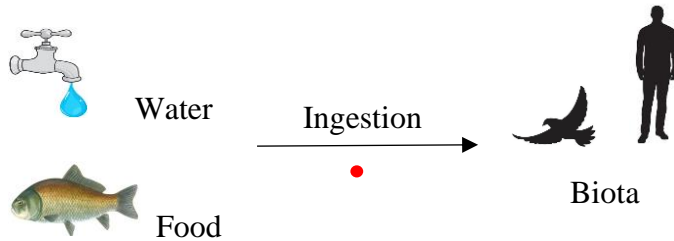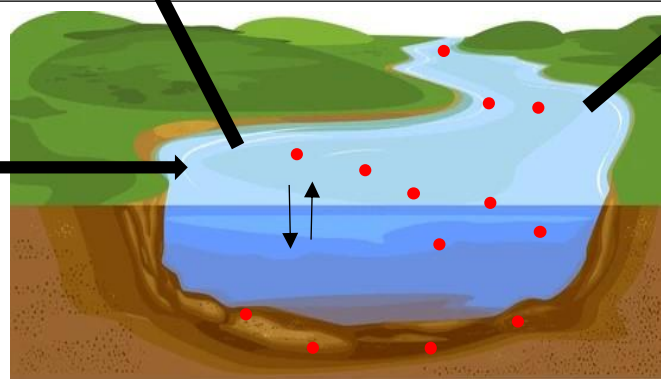

Attanagalla River

● - Microplastics

## Assessment

### Sample collection

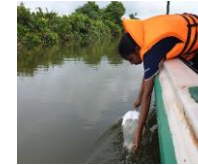

Surface water

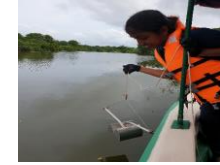

Sediment

Drying

Sieving

Digestion of organic matter

Density separation

Suction filtration

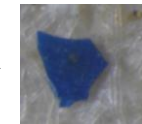

Microplastic
